# Supplementary material
Source: publisher figshare collection journal article supplement (https://karger.figshare.com/ndownloader/files/13698833)
Supplement: Supplementary file 1 [file 13698833]

**Supplemental material**

**Table S1. Patient sample size, low education level, MMSE, inclusion in meta-regression analyses, sample size of control groups used to determine cutoff scores and threshold**

| Cohorts | Patients (N) | Low EL  (%) | Mean MMSE | Meta-regression | Controls  (N) | Threshold |
| --- | --- | --- | --- | --- | --- | --- |
| New York, USA21 | 251 | 36.7 | 24.7 | Yes | 249 | C5 |
| Maastricht, Netherlands52 | 154 | 56.2 | 25.1 | Yes | 539 | C10 |
| Bergamo, Italy53 | 110 | NA | NA | No | NA | NA |
| Finland54 | 451 | 30.6 | 25.3 | Yes | NA | 1SD |
| Lisboa, Portugal55 | 220 | NA | NA | Yes | NA | 2SD |
| Madrid, Spain56 | 209 | 60.0 | 20.4 | Yes | 51 | C6 |
| Sydney, Australia57 | 160 | NA | 27.8 | Yes | 96 | C10 |
| Hong Kong, China58 | 75 | NA | 24.8 | No | 42 | NA |
| Mexico, Mexico59 | 107 | 70.4 | NA | Yes | NA | 2SD |
| Singapore60 | 318 | 8.8 | NA | Yes | NA | 1.5SD |
| South Korea61 | 353 | 41.6 | NA | Yes | NA | C10 |
| Norway62 | 184 | 24.0 | 26.0 | No | NA | NA |
| Sweden63 | 149 | NA | NA | Yes | 745 | C30 |
| Chile64 | 101 | NA | 24.7 | No | NA | NA |
| India65 | 102 | 24.0 | 26.6 | No | NA | NA |
| Nigeria66 | 143 | 14.7 | 24.1 | Yes | 74 | 1.5SD |

EL: education level; MMSE: Mini-Mental State Examination; C: centile; SD: standard deviation; NA: not available

**Figure S2.** **Funnel plots for total (up left), mild (up right) and major (bottom) post-stroke neurocognitive disorders (NCD)**


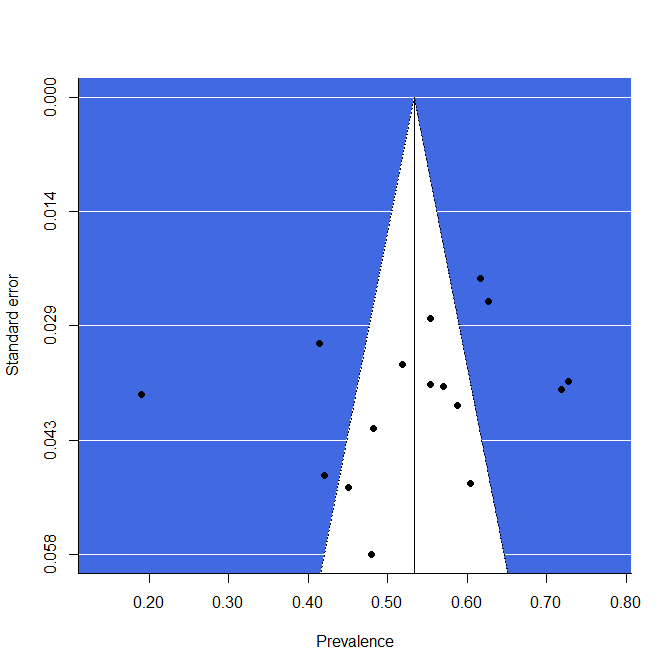

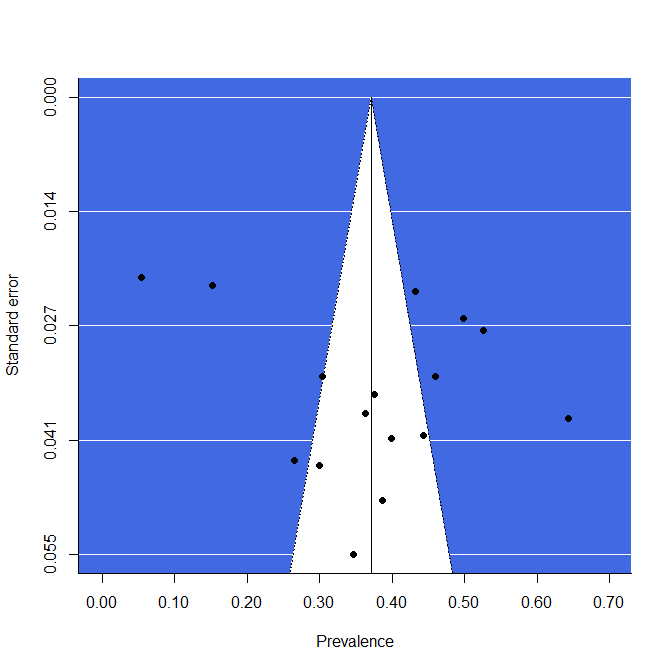

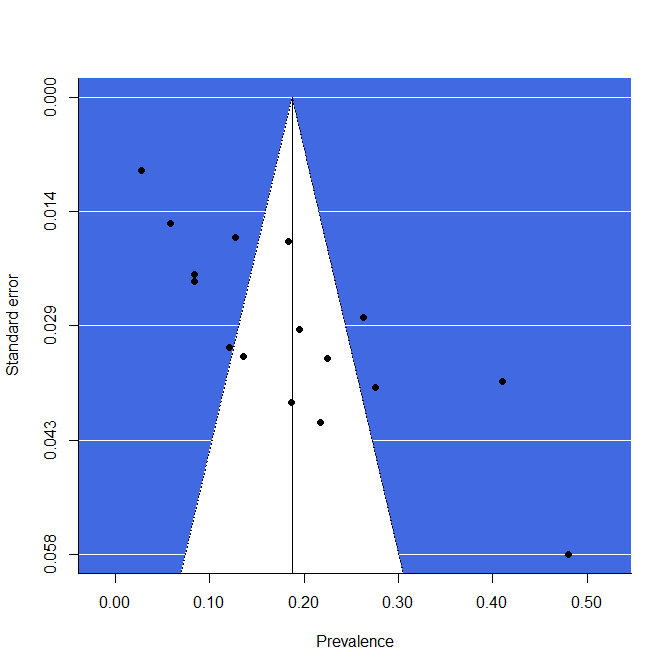


**Figure S3. Effect of age on the prevalence of major post-stroke neurocognitive disorders (NCD).**

**
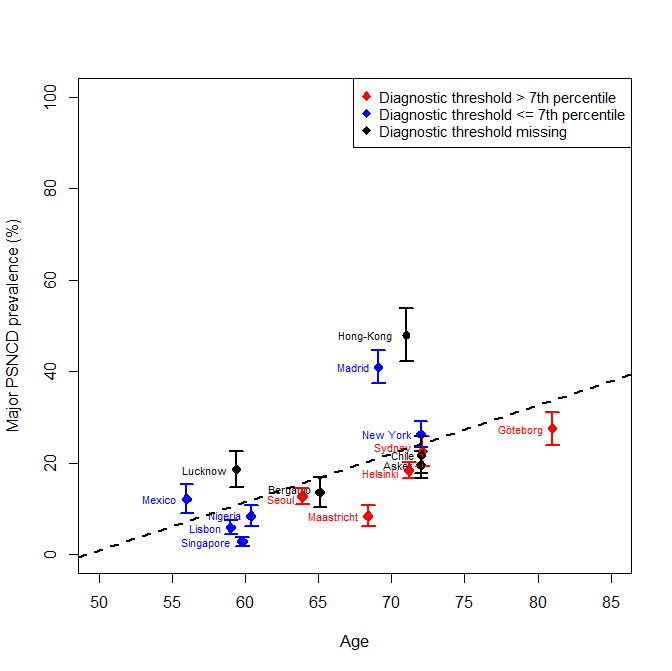
**

Keywords for Pubmed search: *(((human[MeSH]) AND adult[MeSH])) AND (((((cohort studies[MeSH Terms] OR group*[title/abstract])) AND (cognit*[Title] OR neuropsychol*[Title] OR dement*[Title] OR MCI[Title/Abstract])) AND ((stroke[Title/Abstract]) OR (cerebral[Title/Abstract] AND infarct[Title/Abstract]) OR (cerebral[Title/Abstract] AND hemorrhag*[Title/Abstract]) OR (cerebral[Title/Abstract] AND ischem*[Title/Abstract]))) AND ("1990/01/01"[Date - Publication]: "3000"[Date - Publication]))*
